# Supplementary material for: Selective visual detection of trace trinitrotoluene residues based on dual-color fluorescence of graphene oxide–nanocrystals hybrid probe
Source: Royal Society of Chemistry journal article supplement (doi:10.1039/c3an02380j), 2014-01-01
Supplement: c3an02380j1.pdf [file c3an02380j1.pdf]

## **SUPPORTING INFORMATION**

### **Selective Visual Detection of Trace Trinitrotoluene Residues Based on Dual-Color Fluorescence of Graphene Oxide-Nanocrystals Hybrid Probe<sup>†</sup>**

Kui Zhang,<sup>‡a</sup> Lei Yang,<sup>‡b</sup> Houjuan Zhu,<sup>a</sup> Fang Ma,<sup>a</sup> Zhongping Zhang<sup>a</sup> and Suhua Wang<sup>\*a</sup>

\* Corresponding authors. E-mail: shwang@iim.ac.cn

<sup>a</sup> Institute of Intelligent Machines, Chinese Academy of Sciences, Hefei, Anhui 230031, China. E-mail: shwang@iim.ac.cn.

<sup>b</sup> Department of Chemical Physics, University of Science and Technology of China, Hefei, Anhui 230026, China.

<sup>†</sup> Electronic Supplementary Information (ESI) available: Infrared transmission spectroscopy, TEM images of MPA-capped NCs and the nanohybrid probe, The stability of relative fluorescence intensity of the nanohybrid probe. See DOI: 10.1039/b000000x/

<sup>‡</sup> These two authors contributed equally to this work.

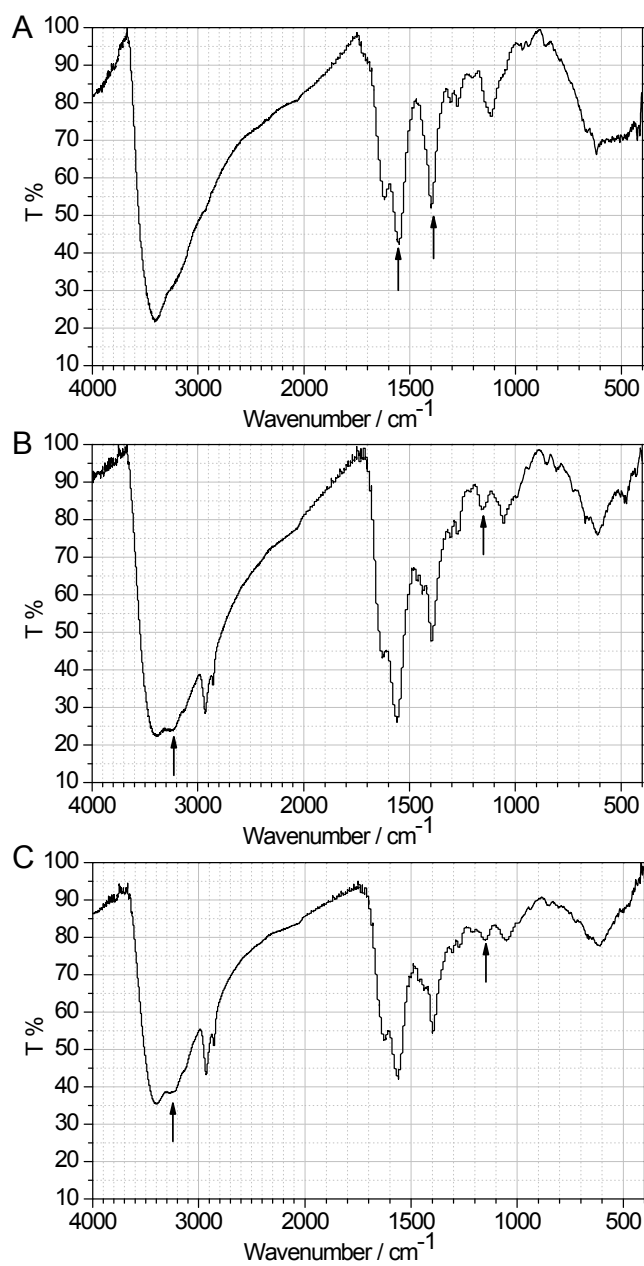

**Fig. S1** Infrared transmission spectra of (A) mercaptoacetic acid capped nanocrystals, (B) HMD-capped NCs, and (C) the nanohybrid probe.

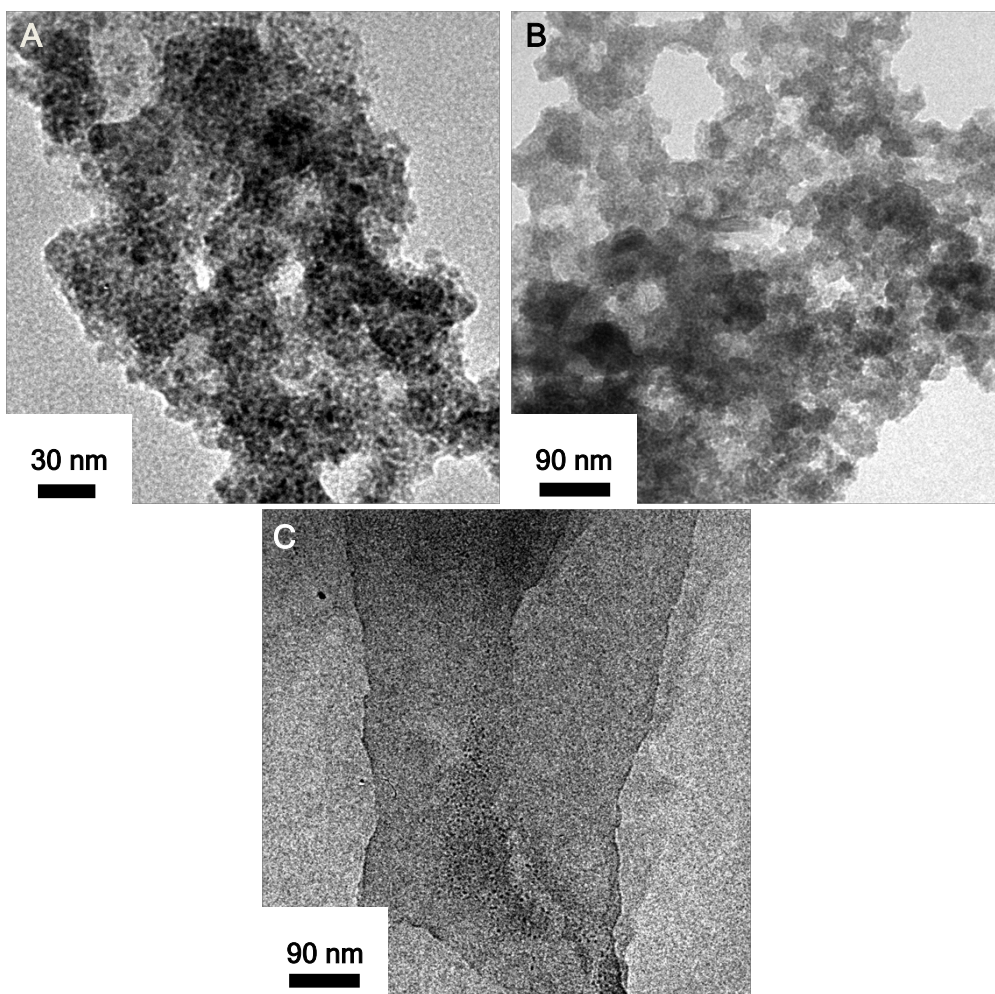

**Fig. S2** TEM images of (A) MPA-capped NCs, (B) the nanohybrid probe, and (C) FGO.

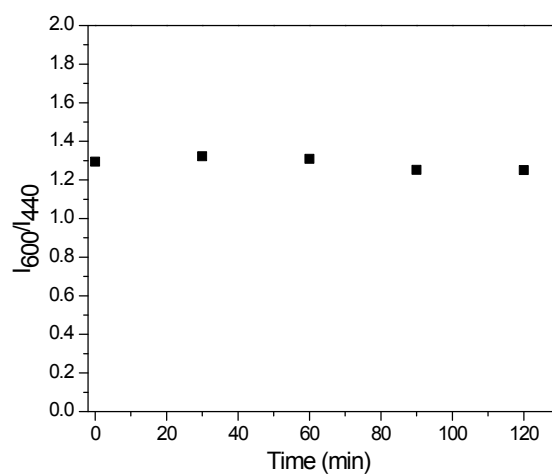

**Fig. S3** The stability of relative fluorescence intensity of the nanohybrid probe at 600 nm versus that at 440 nm. The change of the relative intensity is not significant (< 5%) in 2 hours.

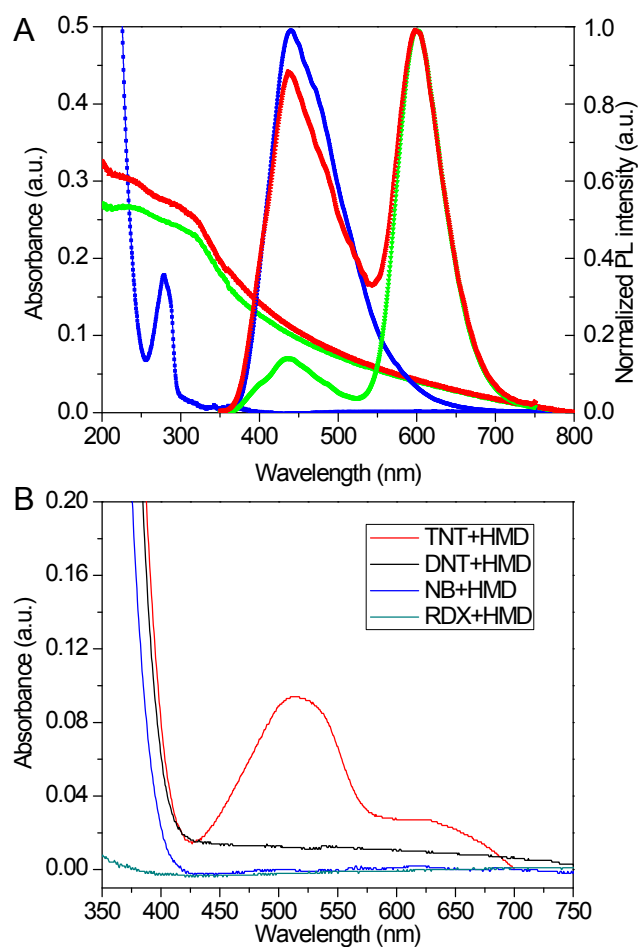

**Fig. S4** (A) Absorption and fluorescence spectra of FGO, MPA-capped NCs, and the dual-color fluorescence nanohybrid probe solution, respectively. (B) Absorption spectra of 2 mM of TNT, DNT, NB, and RDX solution after adding 10  $\mu$ L of HMD.

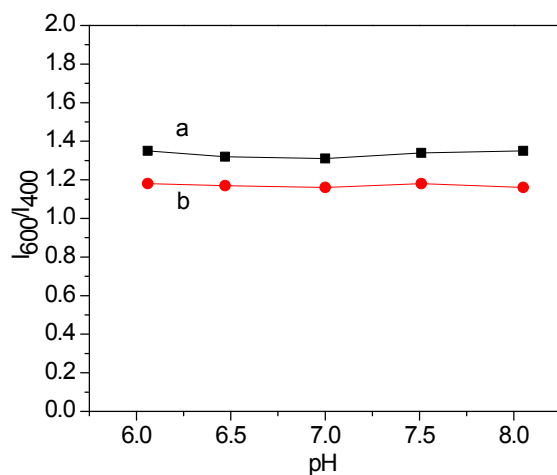

**Fig. S5** Influence of pH values on the fluorescence quenching intensity ratio of (a) before and (b) after adding 25  $\mu\text{M}$  of TNT.

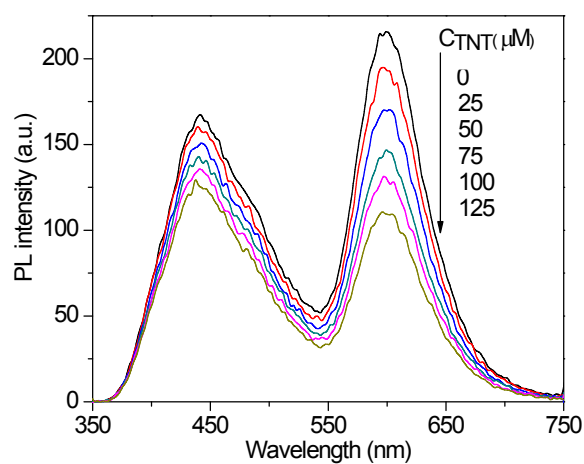

**Fig. S6** The fluorescence spectra of the mixture of FGO and HMD-caped NCs upon the exposure to different concentrations of TNT. The concentrations of TNT from up to down are 0, 25, 50, 75, 100, 125  $\mu\text{M}$ , respectively.
